# Supplementary material for: Synthesis and evaluation of NHC derivatives and 4′-fluorouridine prodrugs
Source: Royal Society of Chemistry journal article supplement (doi:10.1039/d3ob00268c), 2023-01-01
Supplement: d3ob00268c1.pdf [file d3ob00268c1.pdf]

## Electronic Supplementary Information

### Synthesis and evaluation of NHC derivatives and 4'- fluorouridine prodrugs

Li Xiang,<sup>a, b</sup> Tianwen Hu,<sup>b, c</sup> Haitao Xue,<sup>b, c</sup> Wenfang Pan,<sup>b, c</sup> Yuanchao Xie,<sup>\*d</sup> and Jingshan Shen<sup>\*a, b, c</sup>

<sup>a</sup> School of Chinese Materia Medica, Nanjing University of Chinese Medicine, Nanjing 210023, P. R. China.

<sup>b</sup> State Key Laboratory of Drug Research, Shanghai Institute of Materia Medica, Chinese Academy of Sciences, Shanghai 201203, P. R. China.

<sup>c</sup> University of Chinese Academy of Sciences, Beijing 100049, P. R. China.

<sup>d</sup> Lingang Laboratory, Shanghai 200031, P. R. China.

\* Corresponding author. Address of corresponding author at School of Chinese Materia Medica, Nanjing University of Chinese Medicine, Nanjing 210023, P. R. China. E-mail: [shenjingshan@simm.ac.cn](mailto:shenjingshan@simm.ac.cn); Lingang Laboratory, Shanghai 200031, P. R. China. E-mail: [xieyuanchao@lglab.ac.cn](mailto:xieyuanchao@lglab.ac.cn)

**Table of contents for supporting information**

| <b>Description</b>                                                        | <b>page</b> |
|---------------------------------------------------------------------------|-------------|
| 1. General information                                                    | 2           |
| 2. <sup>1</sup> H NMR, <sup>13</sup> C NMR spectra of compound <b>1a</b>  | 3           |
| 3. <sup>1</sup> H NMR, <sup>13</sup> C NMR spectra of compound <b>1b</b>  | 4           |
| 4. <sup>1</sup> H NMR, <sup>13</sup> C NMR spectra of compound <b>1c</b>  | 5           |
| 5. <sup>1</sup> H NMR, <sup>13</sup> C NMR spectra of compound <b>2a</b>  | 6           |
| 6. <sup>1</sup> H NMR, <sup>13</sup> C NMR spectra of compound <b>2b</b>  | 7           |
| 7. <sup>1</sup> H NMR, <sup>13</sup> C NMR spectra of compound <b>2c</b>  | 8           |
| 8. <sup>1</sup> H NMR, <sup>13</sup> C NMR spectra of compound <b>3a</b>  | 9           |
| 9. <sup>1</sup> H NMR, <sup>13</sup> C NMR spectra of compound <b>3b</b>  | 10          |
| 10. <sup>1</sup> H NMR, <sup>13</sup> C NMR spectra of compound <b>3c</b> | 11          |
| 11. <sup>1</sup> H NMR, <sup>13</sup> C NMR spectra of compound <b>3d</b> | 12          |
| 12. <sup>1</sup> H NMR spectra of compound <b>4a</b>                      | 13          |
| 13. <sup>1</sup> H NMR, <sup>13</sup> C NMR spectra of compound <b>4b</b> | 14          |
| 14. <sup>1</sup> H NMR, <sup>13</sup> C NMR spectra of compound <b>4c</b> | 15          |
| 15. <sup>1</sup> H NMR, <sup>13</sup> C NMR spectra of compound <b>4d</b> | 16          |
| 16. <sup>1</sup> H NMR, <sup>13</sup> C NMR spectra of compound <b>4e</b> | 17          |
| 17. The HPLC chromatogram of compound <b>22</b>                           | 18          |
| 18. The HPLC chromatogram of compound <b>4d</b>                           | 19          |

## 2. $^1\text{H}$ NMR, $^{13}\text{C}$ NMR spectrum of compound 1a

$^1\text{H}$  NMR (500 MHz,  $\text{DMSO-}d_6$ )

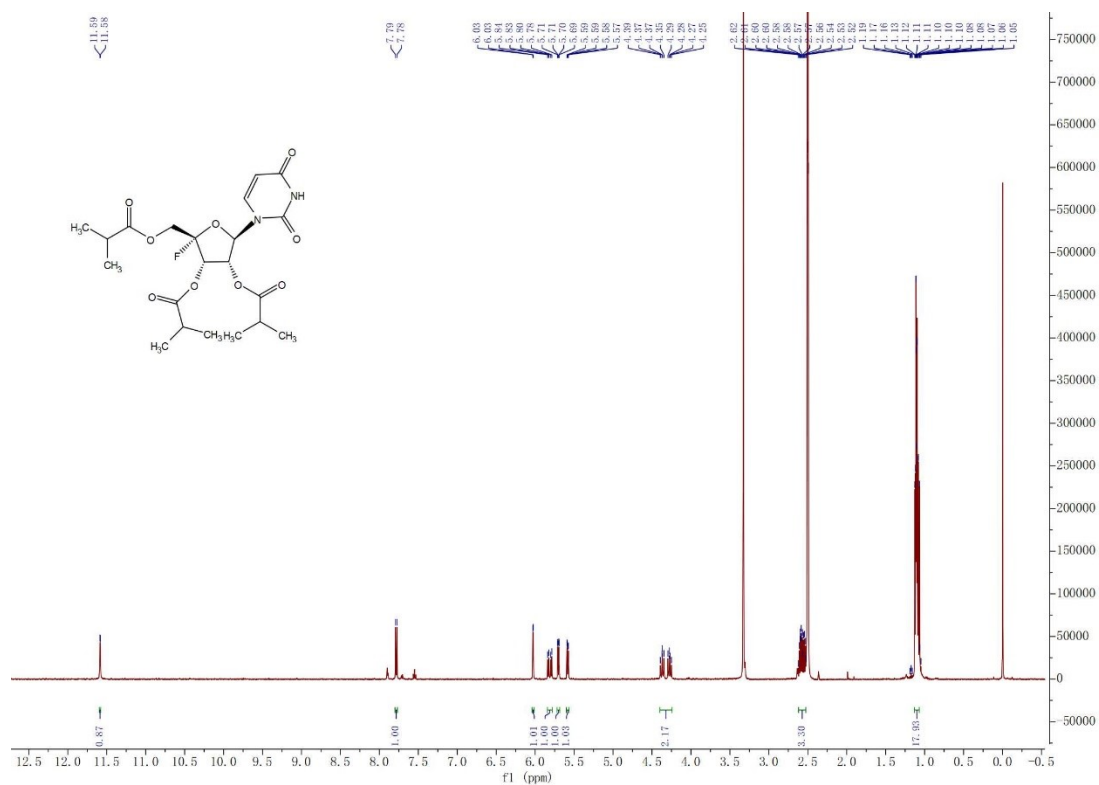

$^{13}\text{C}$  NMR (151 MHz,  $\text{DMSO-}d_6$ )

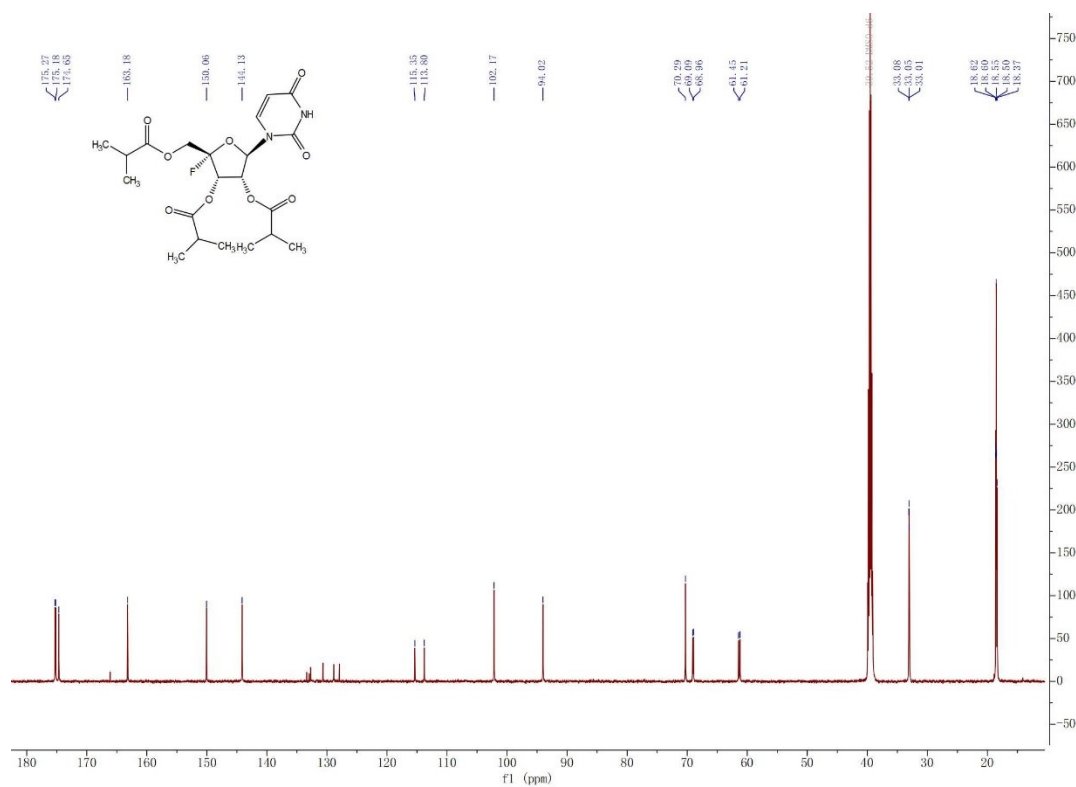

### 3. <sup>1</sup>H NMR, <sup>13</sup>C NMR spectrum of compound 1b

<sup>1</sup>H NMR (400 MHz, DMSO-d<sub>6</sub>)

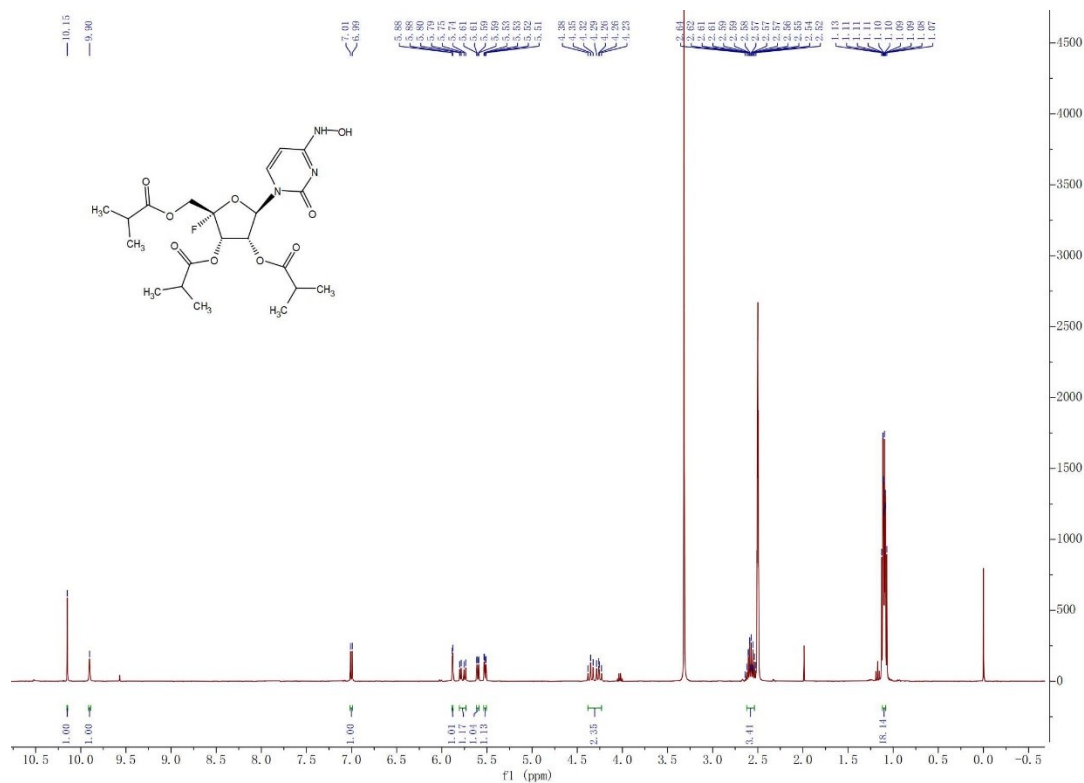

<sup>13</sup>C NMR (126 MHz, DMSO-d<sub>6</sub>)

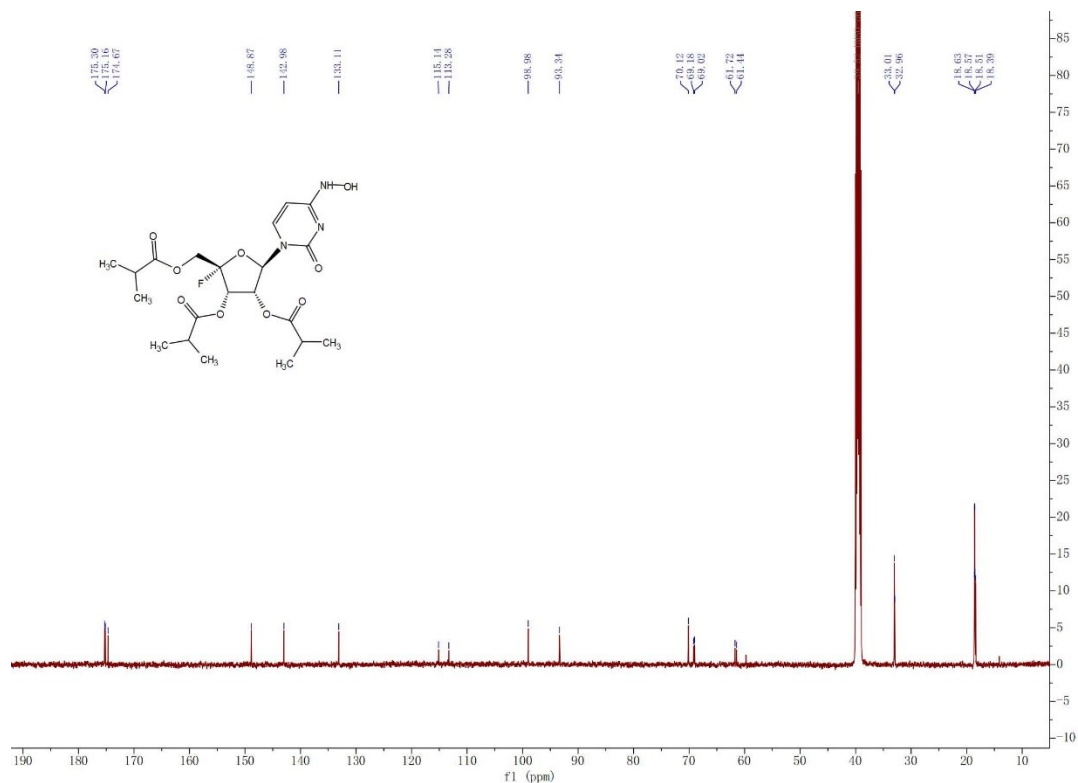

#### 4. <sup>1</sup>H NMR, <sup>13</sup>C NMR spectrum of compound 1c

<sup>1</sup>H NMR (400 MHz, DMSO-*d*<sub>6</sub>)

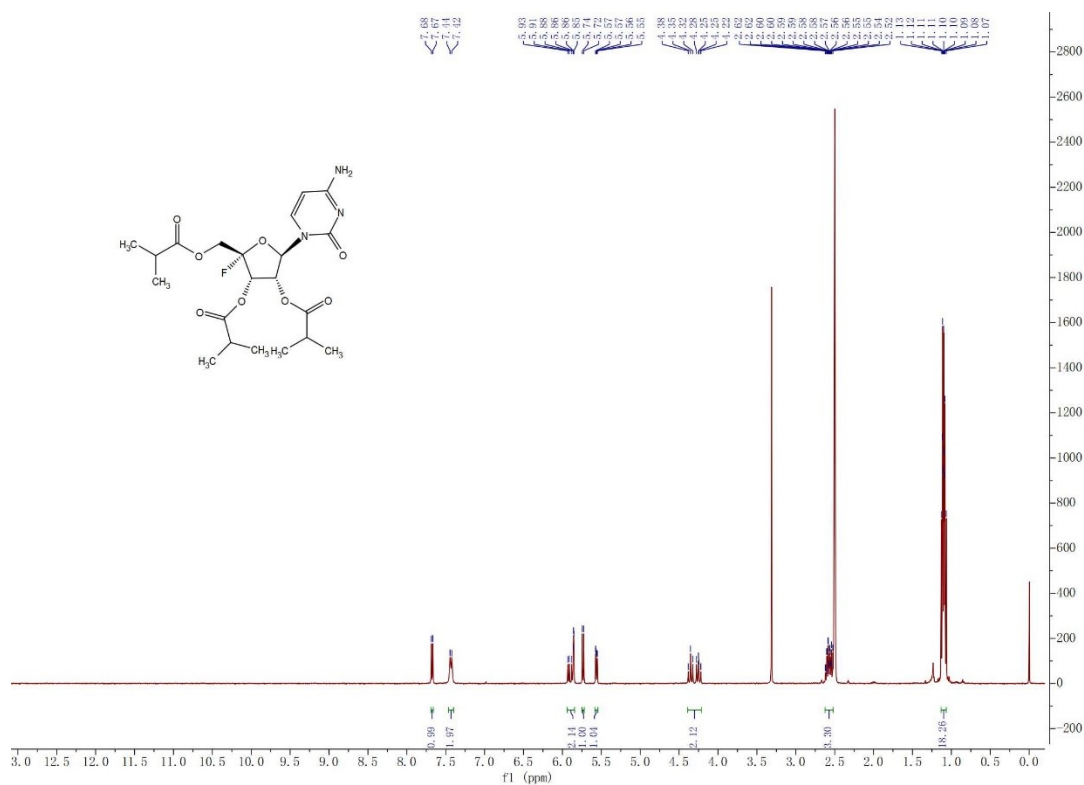

<sup>13</sup>C NMR (151 MHz, DMSO-*d*<sub>6</sub>)

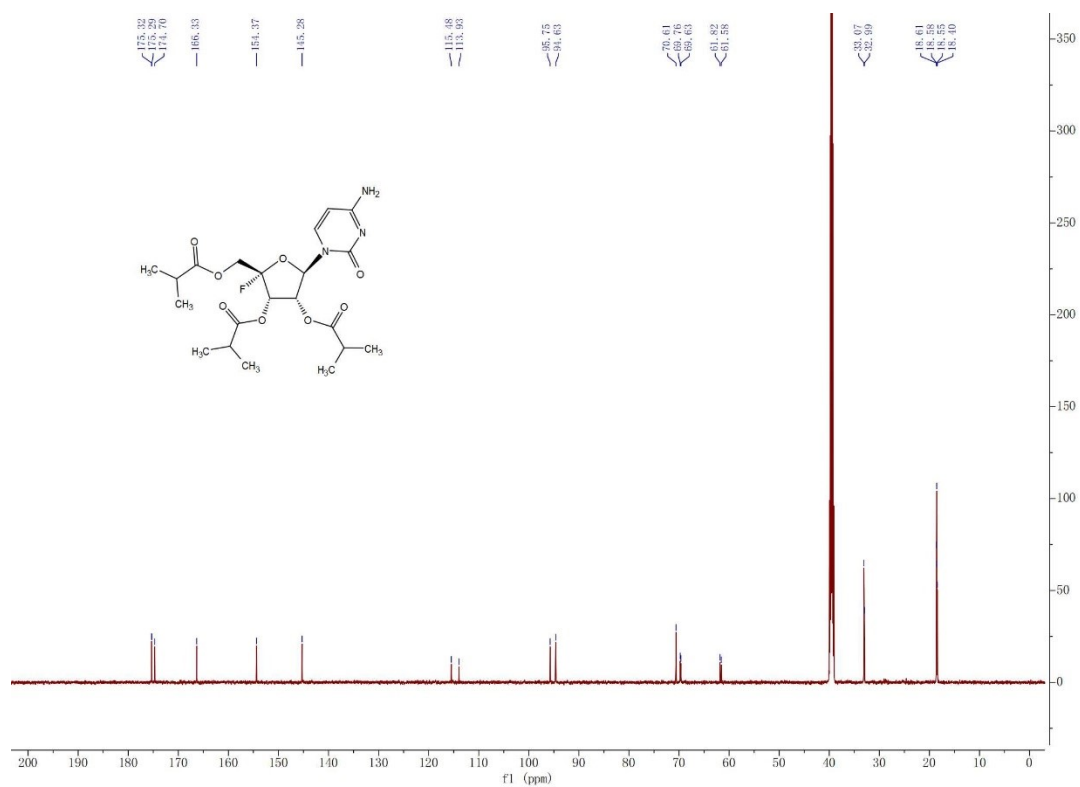

## 5. $^1\text{H}$ NMR, $^{13}\text{C}$ NMR spectrum of compound 2a

$^1\text{H}$  NMR (500 MHz,  $\text{DMSO}-d_6$ )

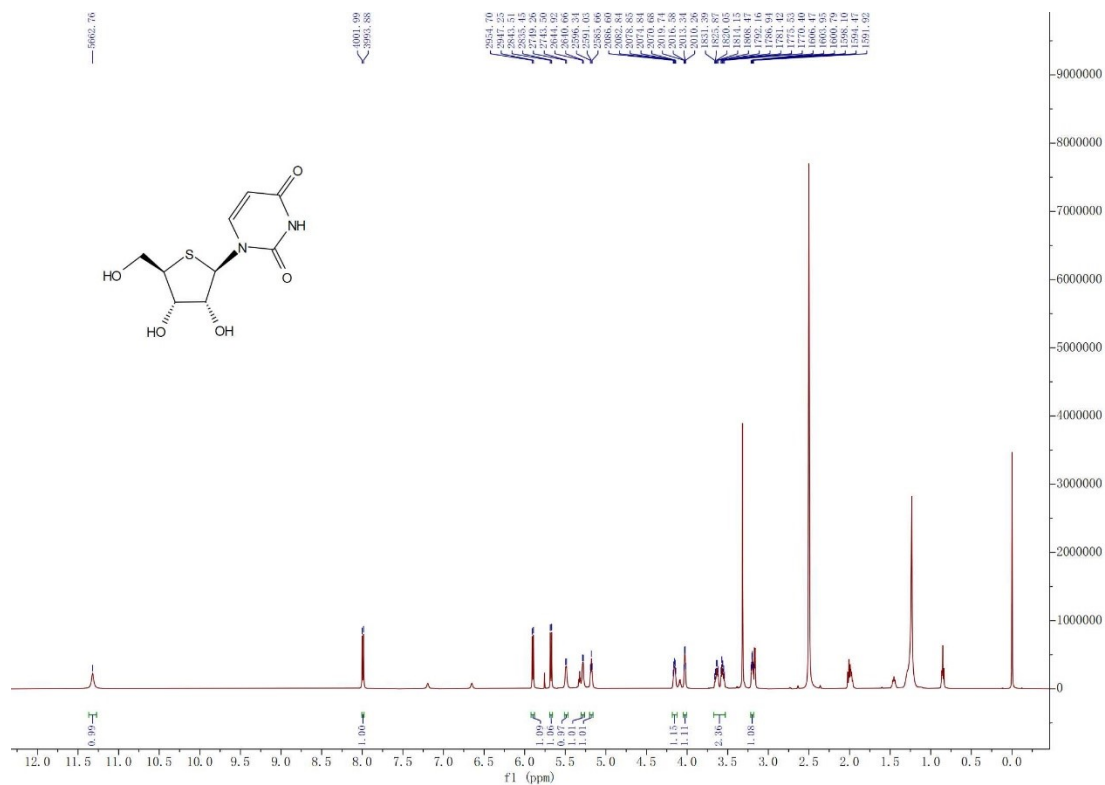

$^{13}\text{C}$  NMR (126 MHz,  $\text{DMSO}-d_6$ )

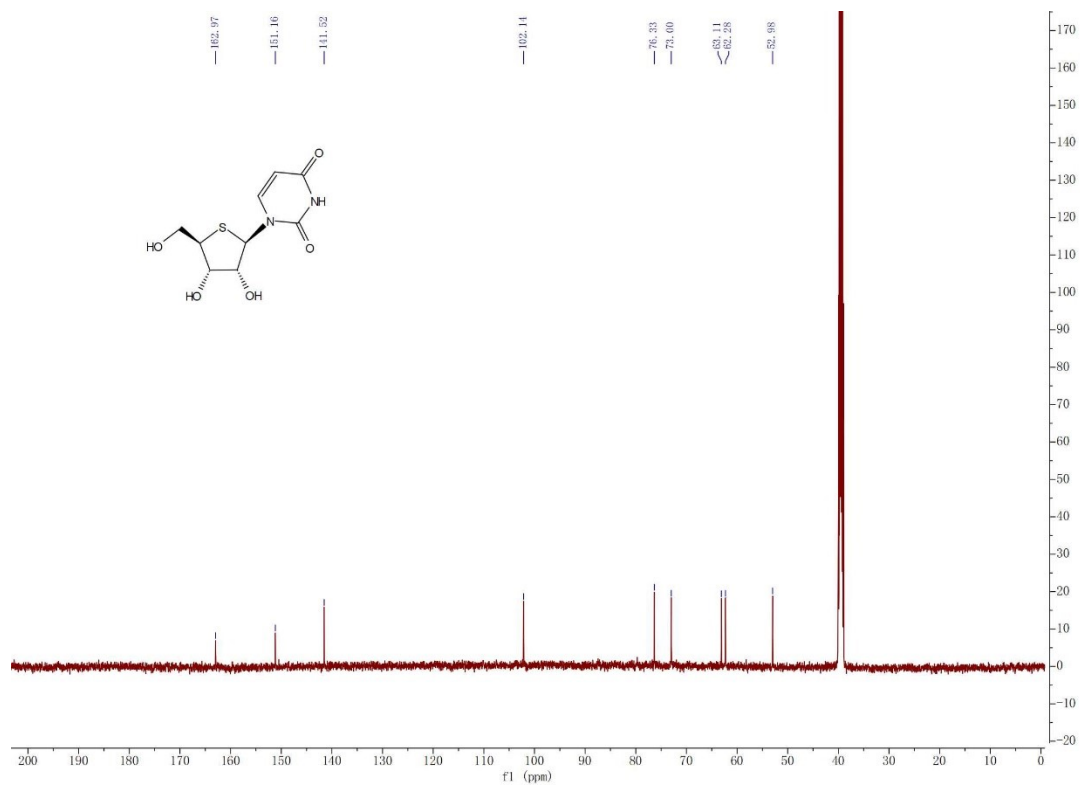

## 6. $^1\text{H}$ NMR, $^{13}\text{C}$ NMR spectrum of compound 2b

$^1\text{H}$  NMR (600 MHz, DMSO- $d_6$ )

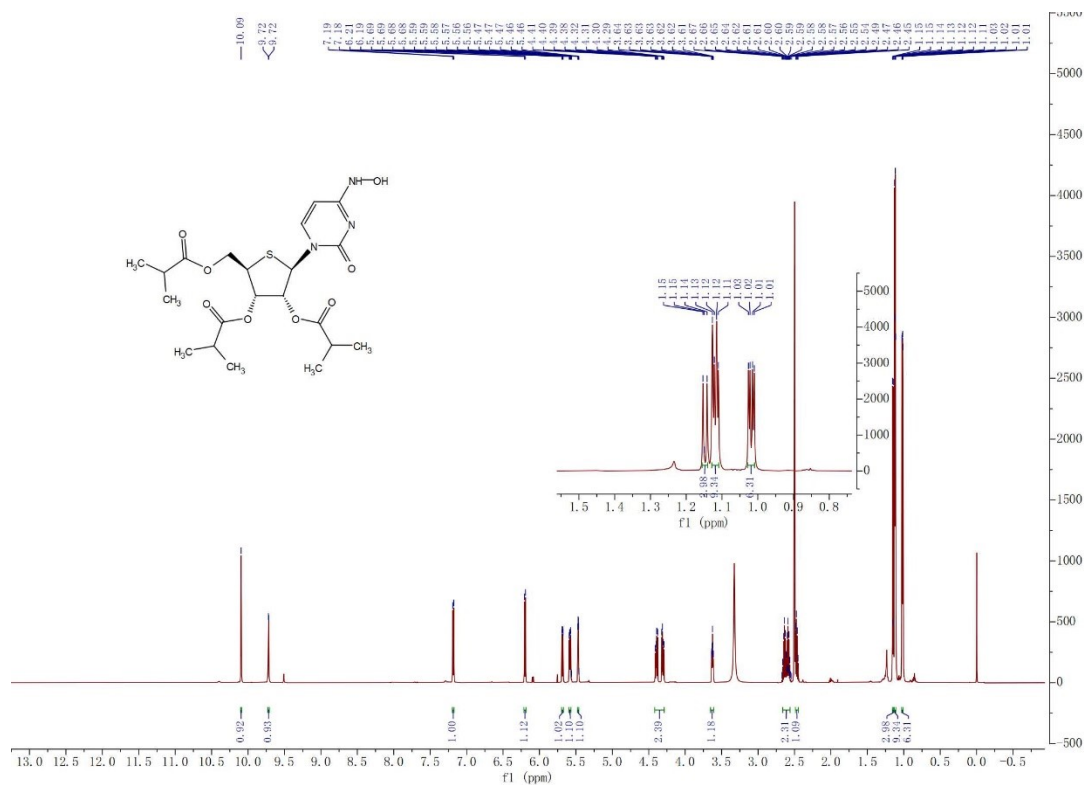

$^{13}\text{C}$  NMR (126 MHz, DMSO- $d_6$ )

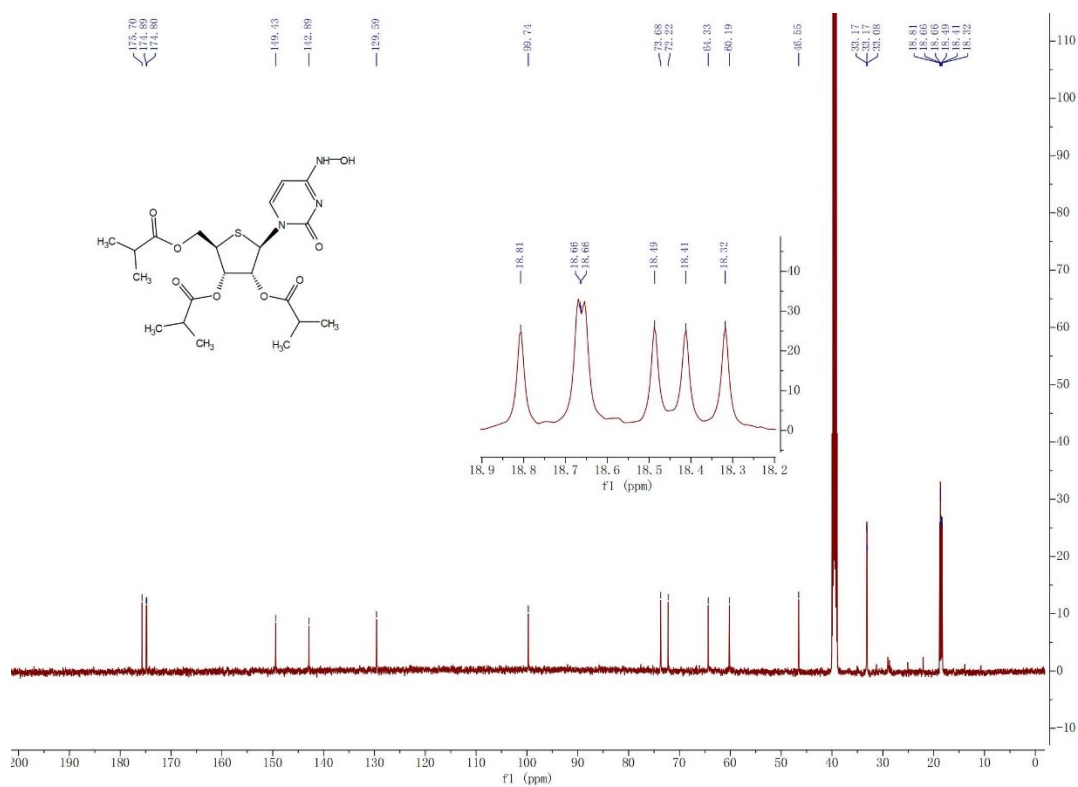

## 7. $^1\text{H}$ NMR, $^{13}\text{C}$ NMR spectrum of compound 2c

$^1\text{H}$  NMR (600 MHz,  $\text{DMSO}-d_6$ )

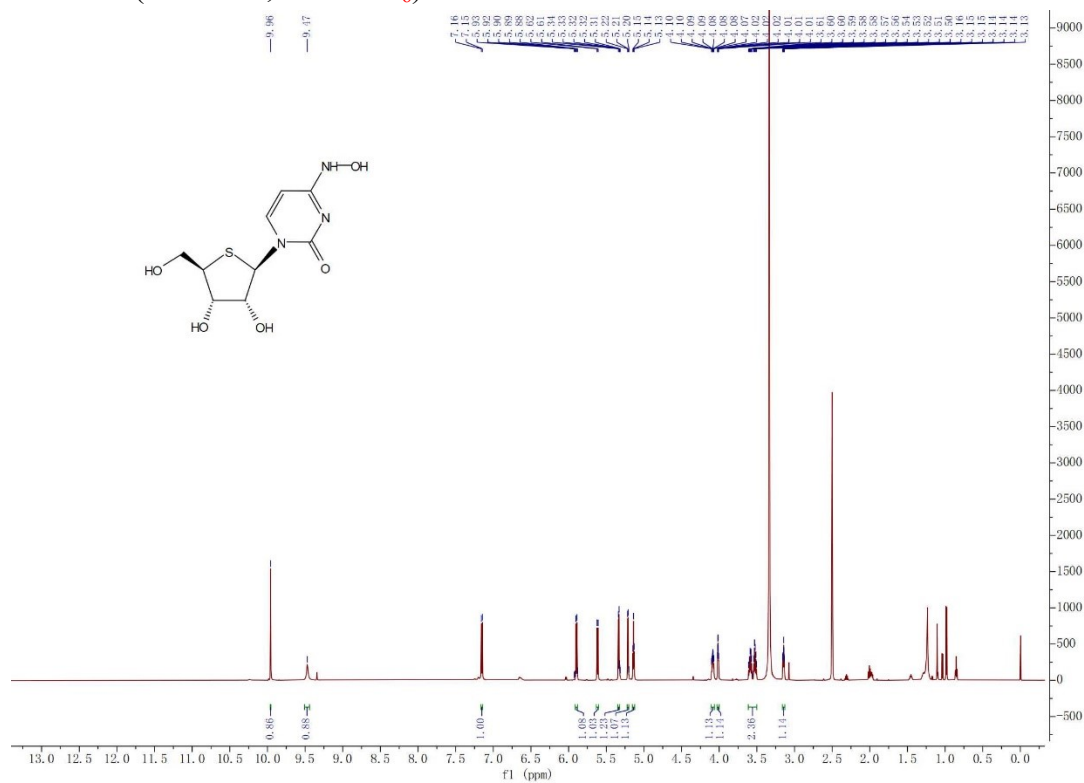

$^{13}\text{C}$  NMR (126 MHz,  $\text{DMSO}-d_6$ )

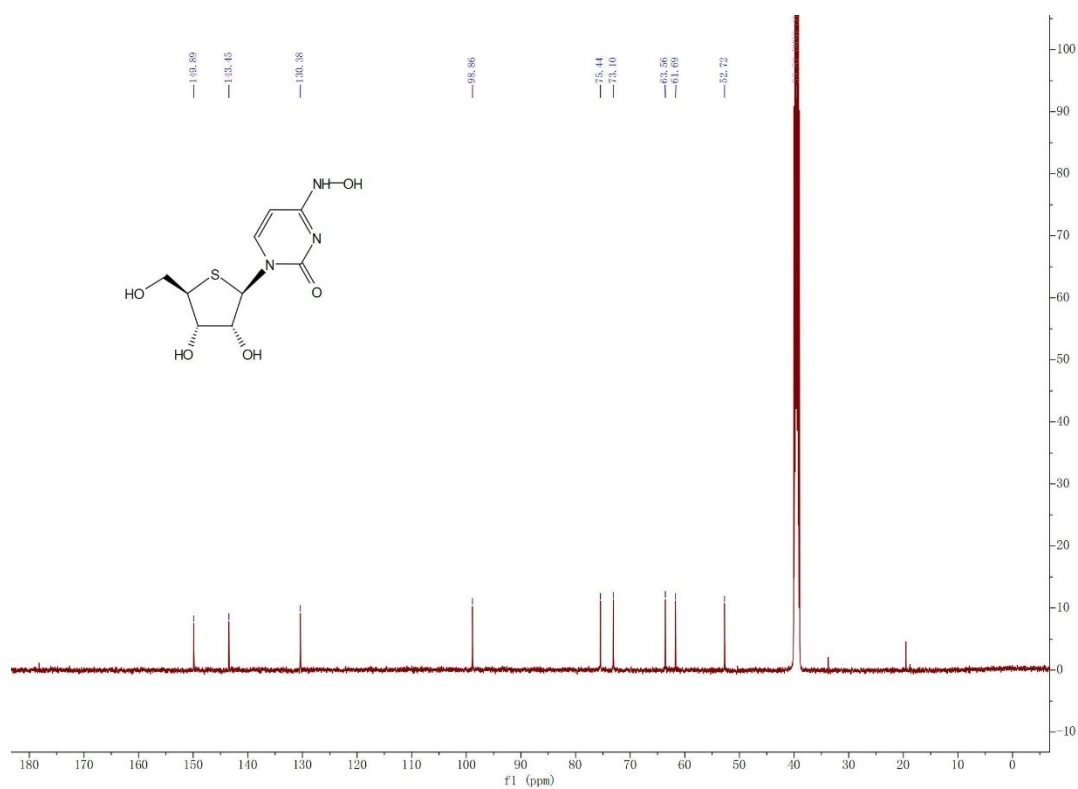



## 8. $^1\text{H}$ NMR, $^{13}\text{C}$ NMR spectrum of compound 3a

$^1\text{H}$  NMR (500 MHz,  $\text{DMSO-}d_6$ )

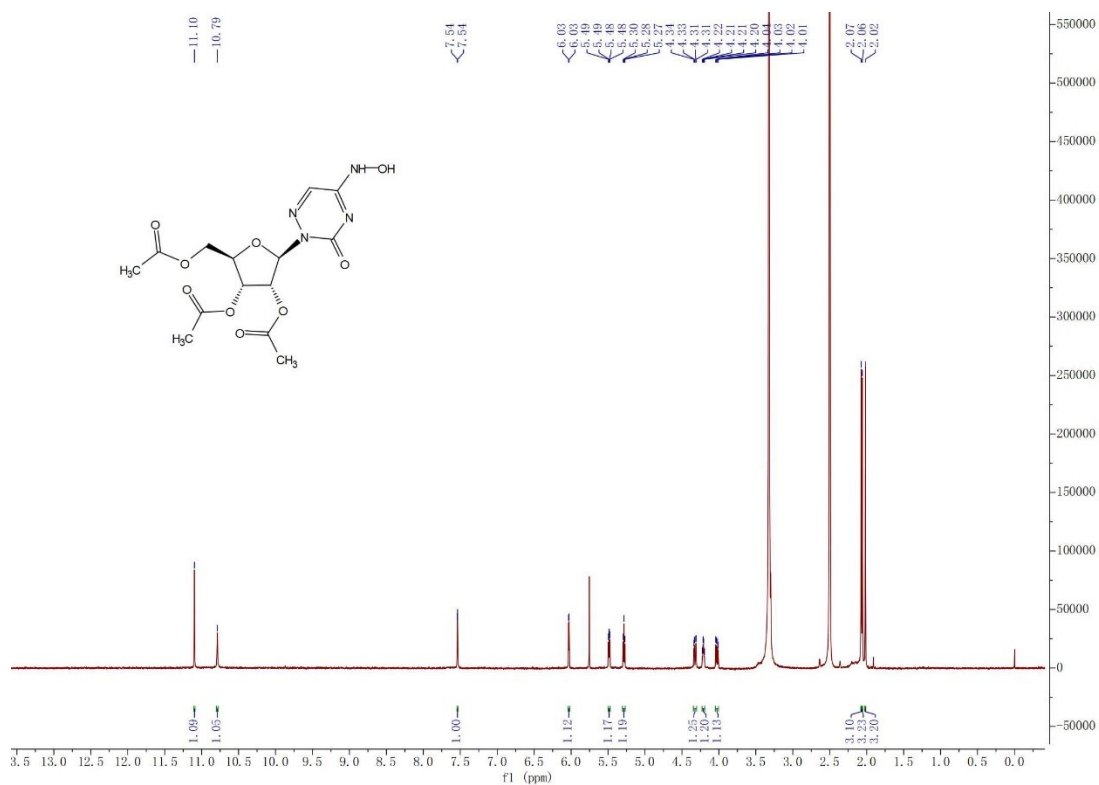

$^{13}\text{C}$  NMR (151 MHz,  $\text{DMSO-}d_6$ )

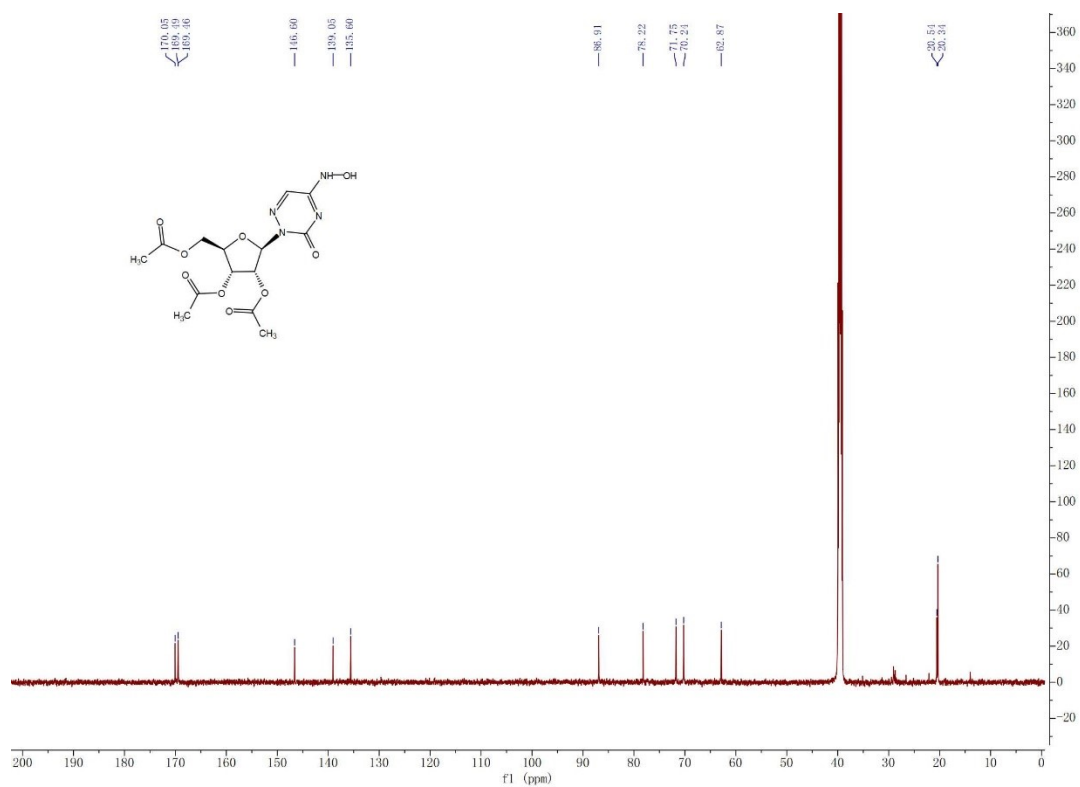

## 9. $^1\text{H}$ NMR, $^{13}\text{C}$ NMR spectrum of compound 3b

$^1\text{H}$  NMR (500 MHz,  $\text{DMSO-}d_6$ )

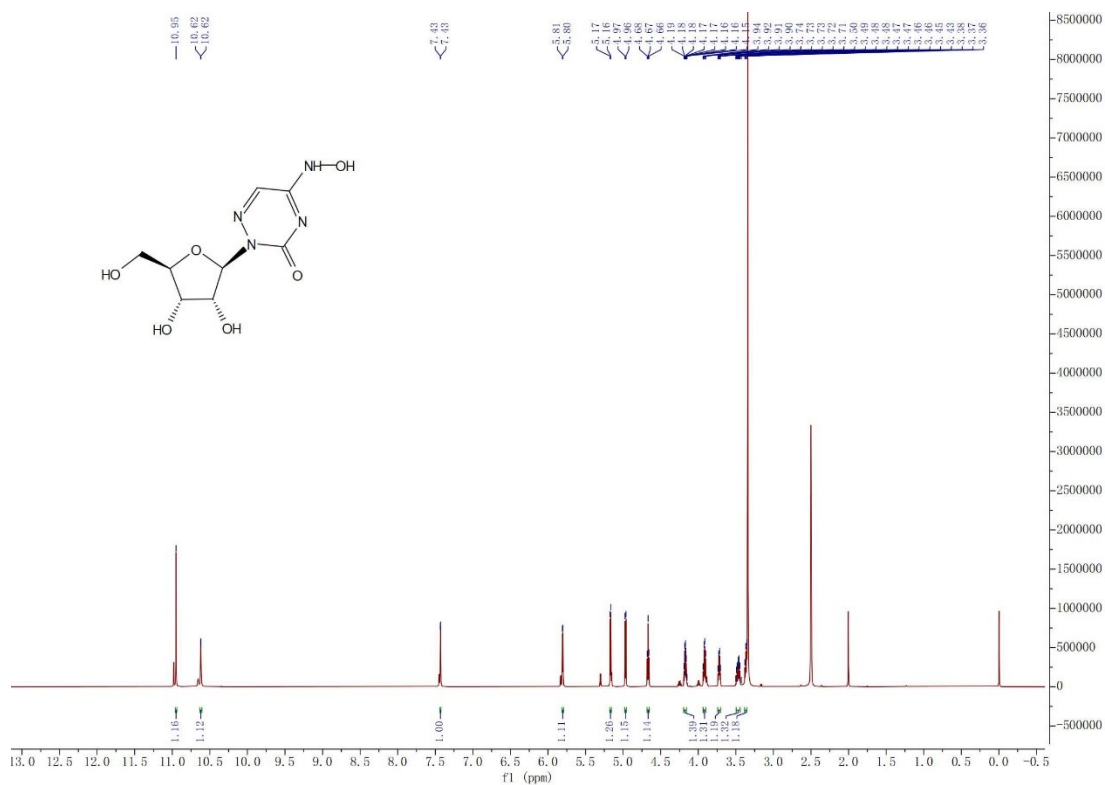

$^{13}\text{C}$  NMR (126 MHz,  $\text{DMSO-}d_6$ )

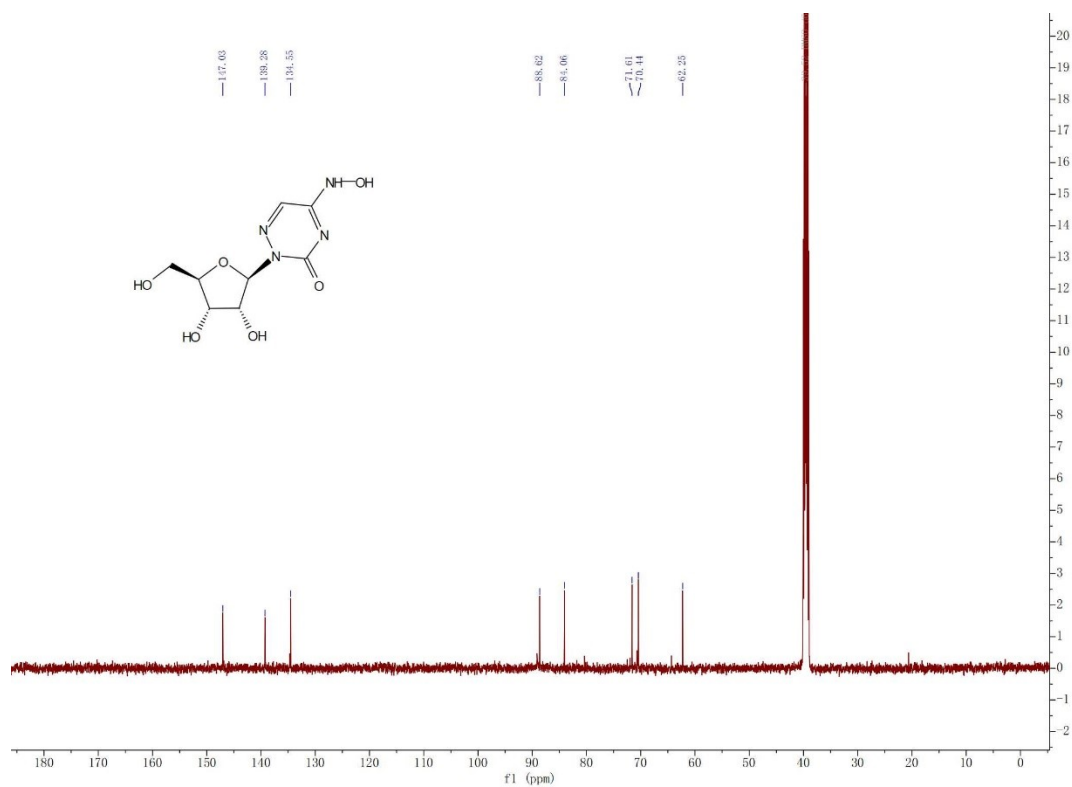

## 10. $^1\text{H}$ NMR, $^{13}\text{C}$ NMR spectrum of compound 3c

$^1\text{H}$  NMR (500 MHz,  $\text{DMSO-}d_6$ )

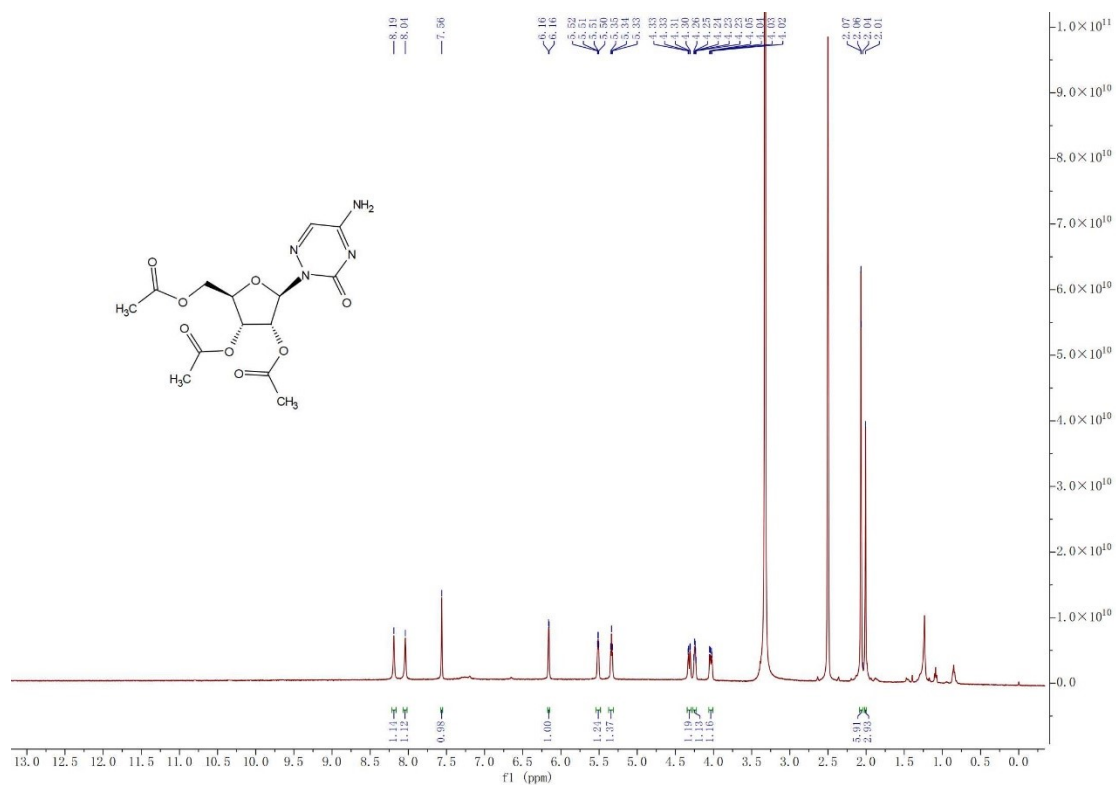

$^{13}\text{C}$  NMR (201 MHz,  $\text{DMSO-}d_6$ )

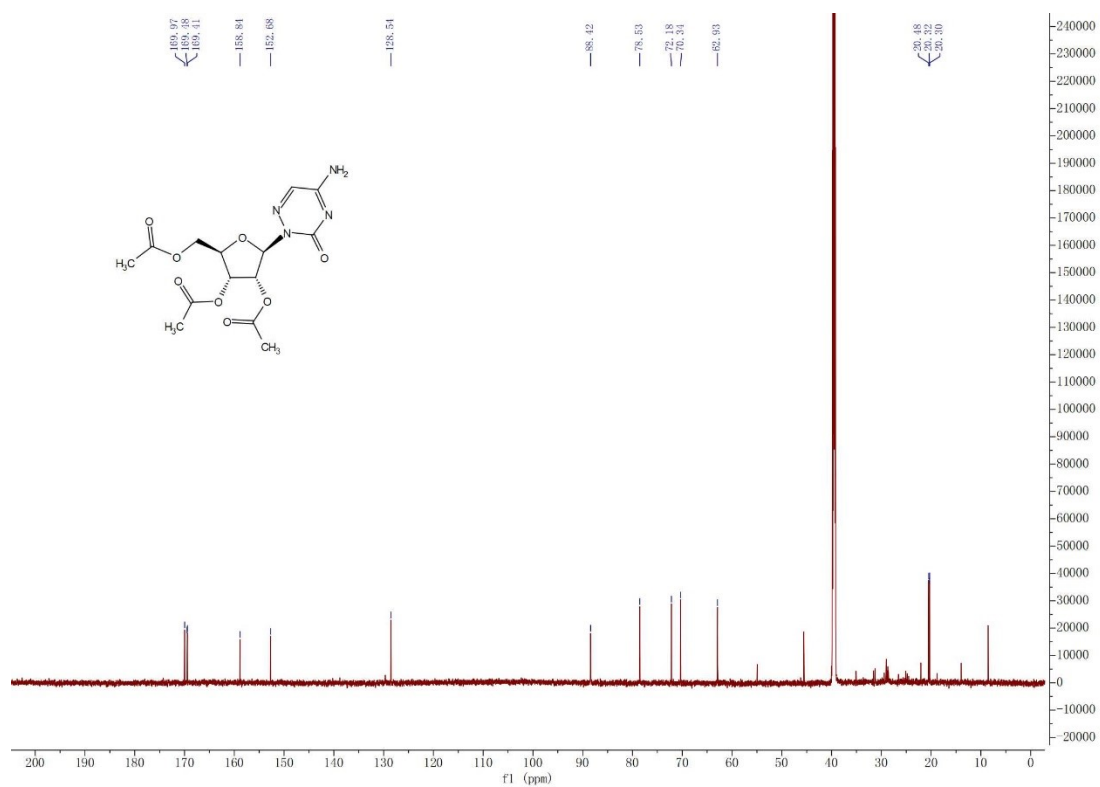

## 11. $^1\text{H}$ NMR, $^{13}\text{C}$ NMR spectrum of compound 3d

$^1\text{H}$  NMR (400 MHz,  $\text{DMSO-}d_6$ )

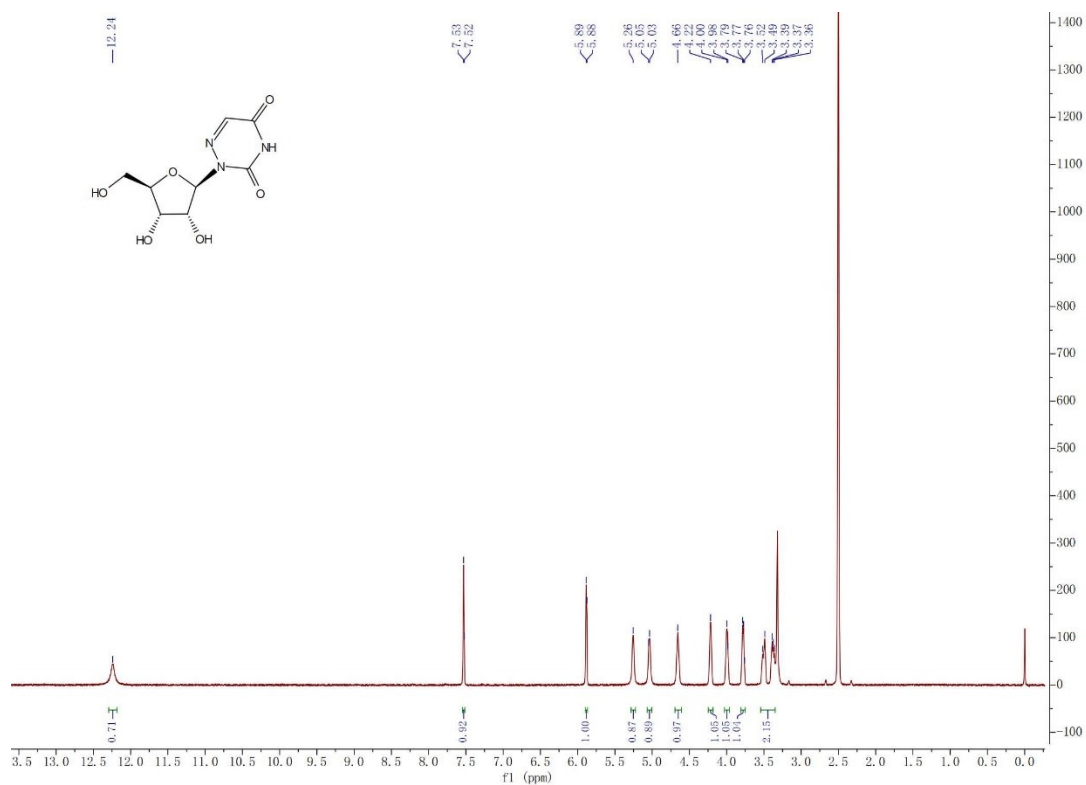

$^{13}\text{C}$  NMR (126 MHz,  $\text{DMSO-}d_6$ )

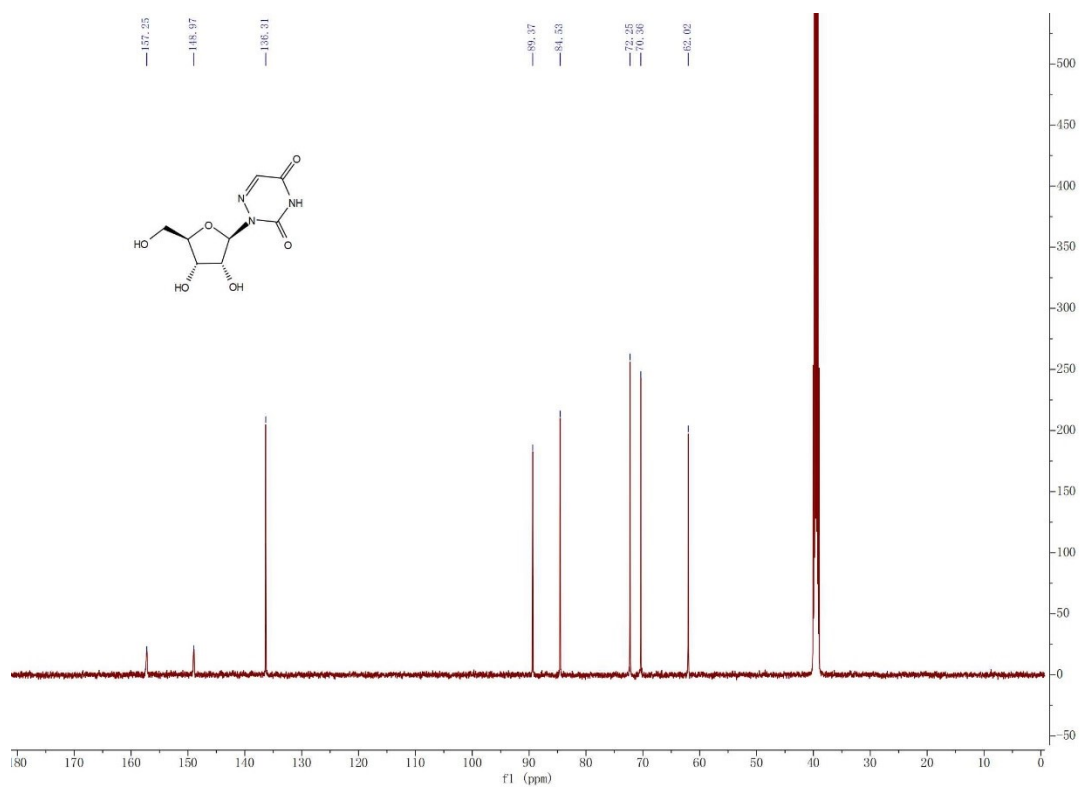

## 12. <sup>1</sup>H NMR spectrum of compound 4a

<sup>1</sup>H NMR (400 MHz, Methanol-*d*<sub>4</sub>)

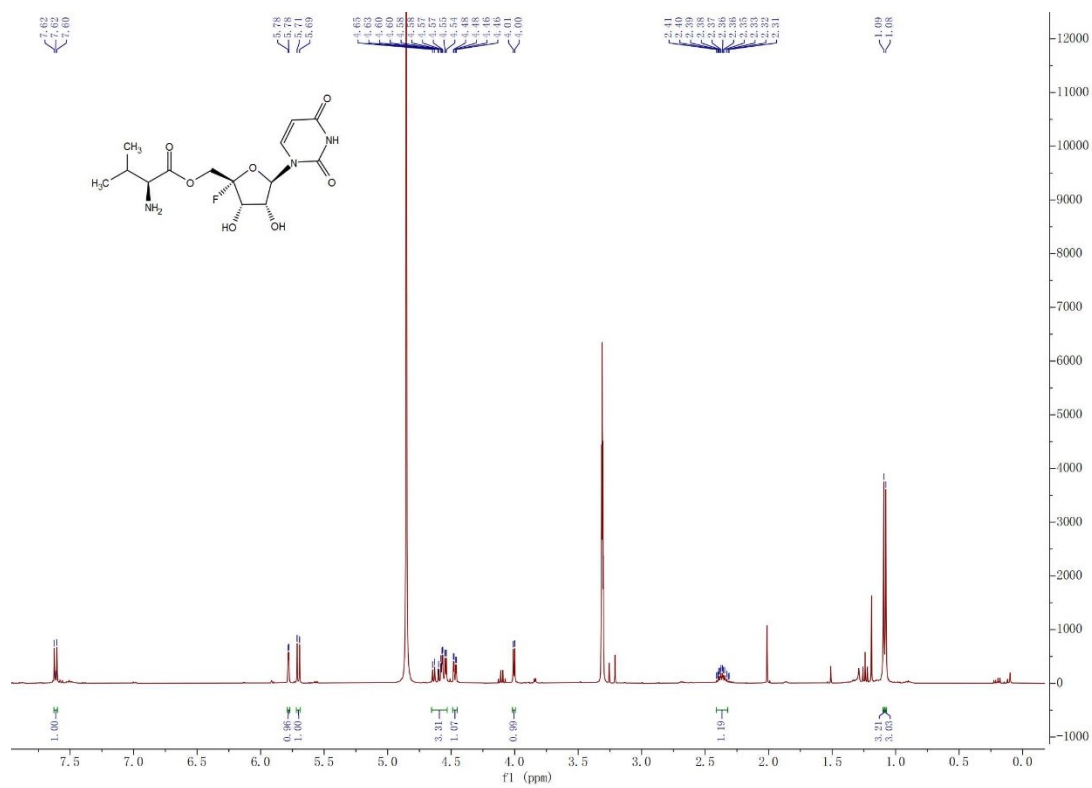

### 13. <sup>1</sup>H NMR, <sup>13</sup>C NMR spectrum of compound 4b

<sup>1</sup>H NMR (500 MHz, Methanol-*d*<sub>4</sub>)

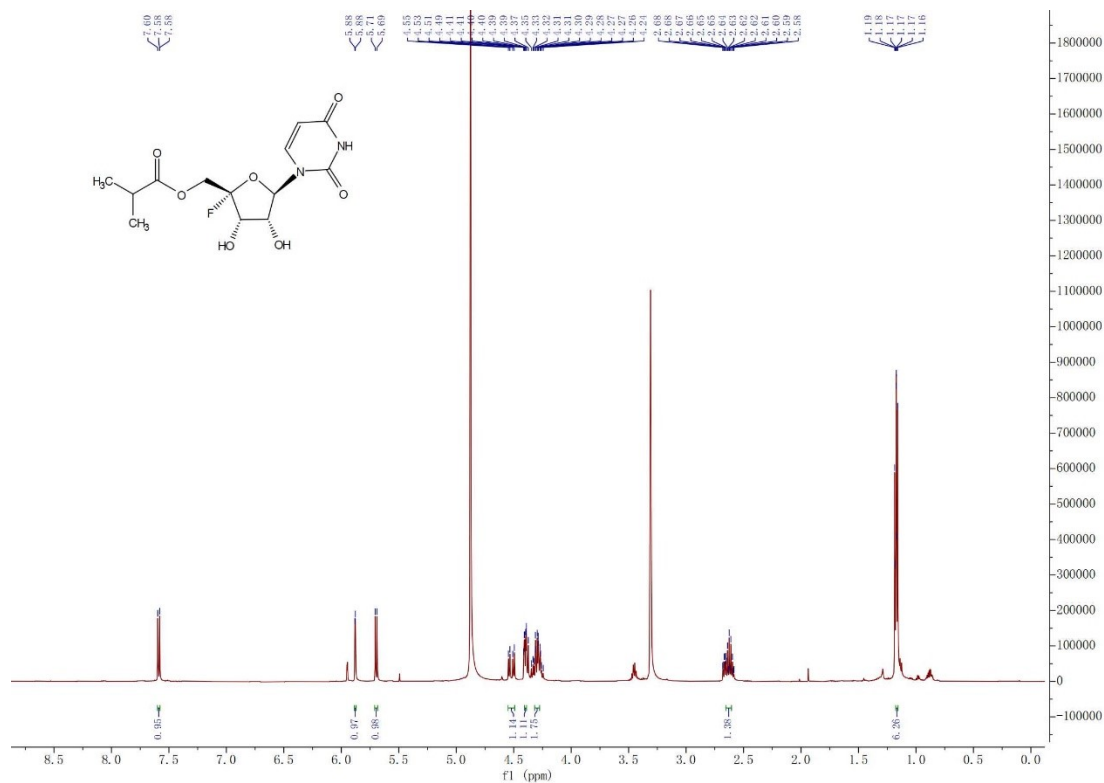

<sup>13</sup>C NMR (151 MHz, DMSO-*d*<sub>6</sub>)

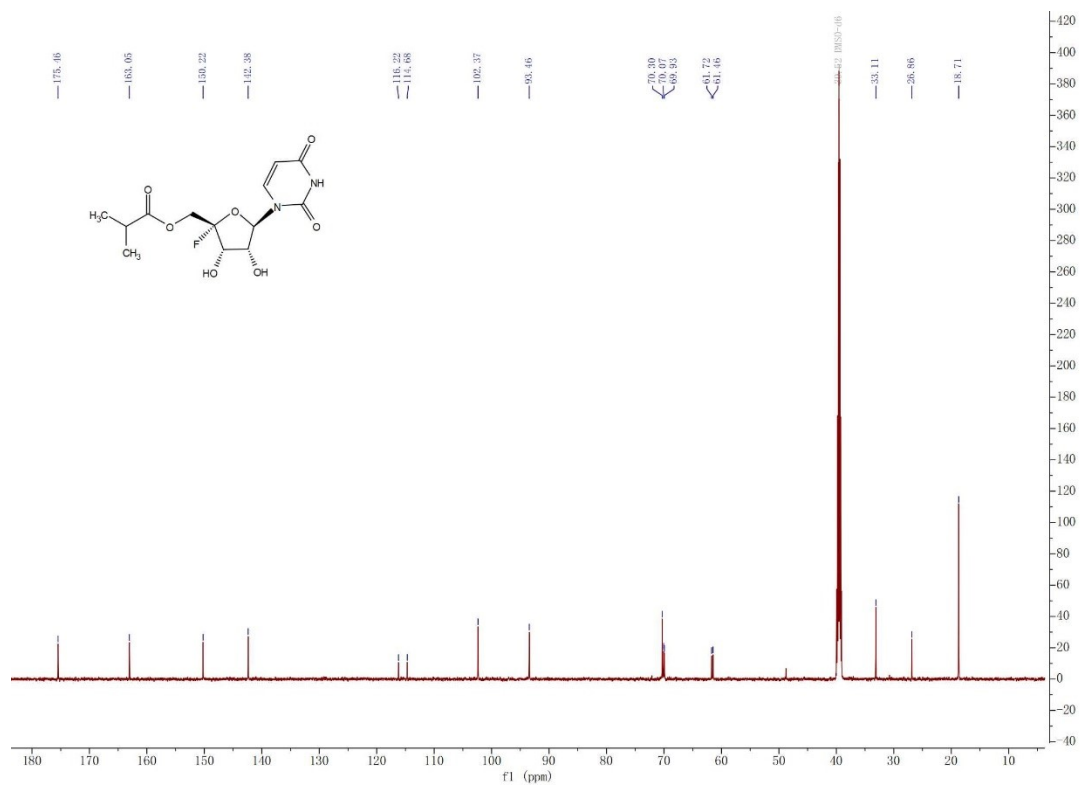

## 14. $^1\text{H}$ NMR, $^{13}\text{C}$ NMR spectrum of compound 4c

$^1\text{H}$  NMR (400 MHz,  $\text{DMSO-}d_6$ )

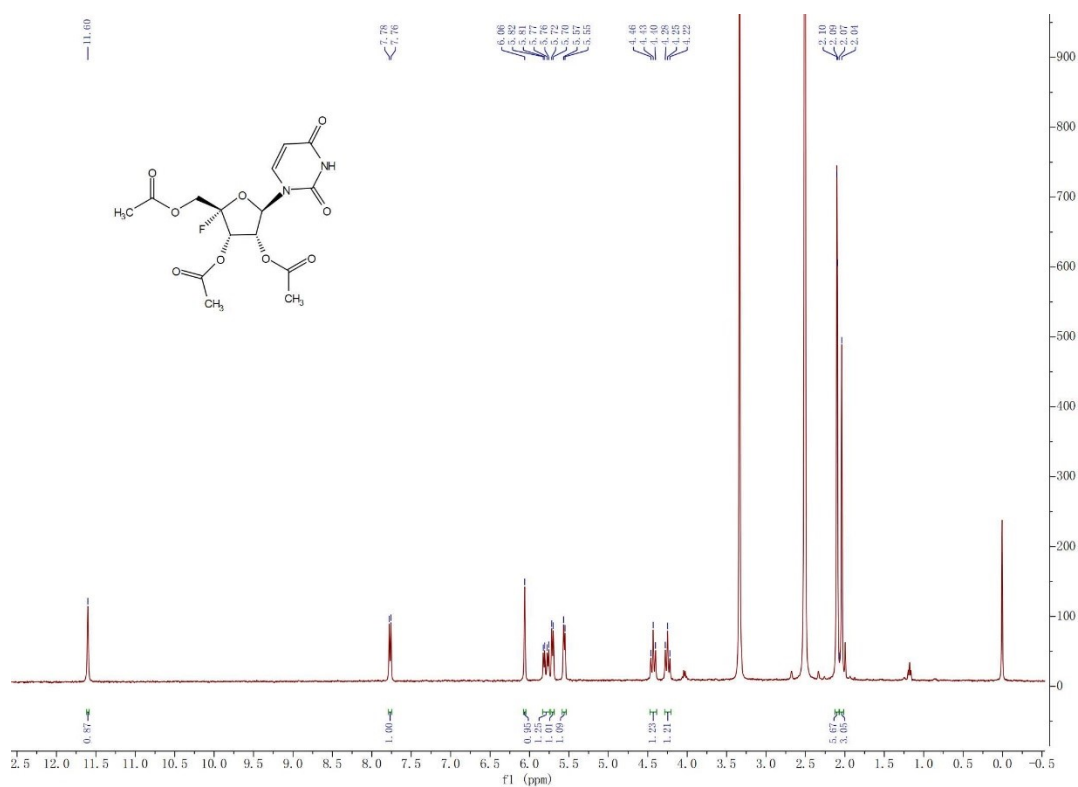

$^{13}\text{C}$  NMR (126 MHz,  $\text{DMSO-}d_6$ )

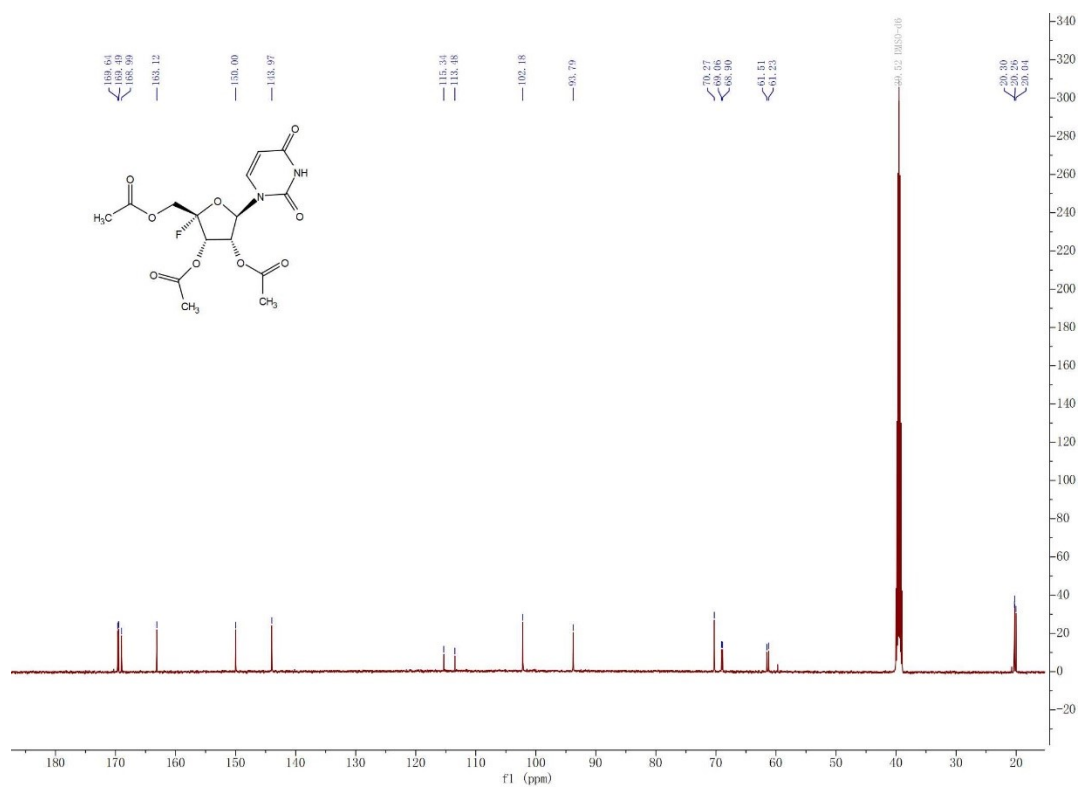

## 15. $^1\text{H}$ NMR, $^{13}\text{C}$ NMR spectrum of compound 4d

$^1\text{H}$  NMR (500 MHz,  $\text{DMSO-}d_6$ )

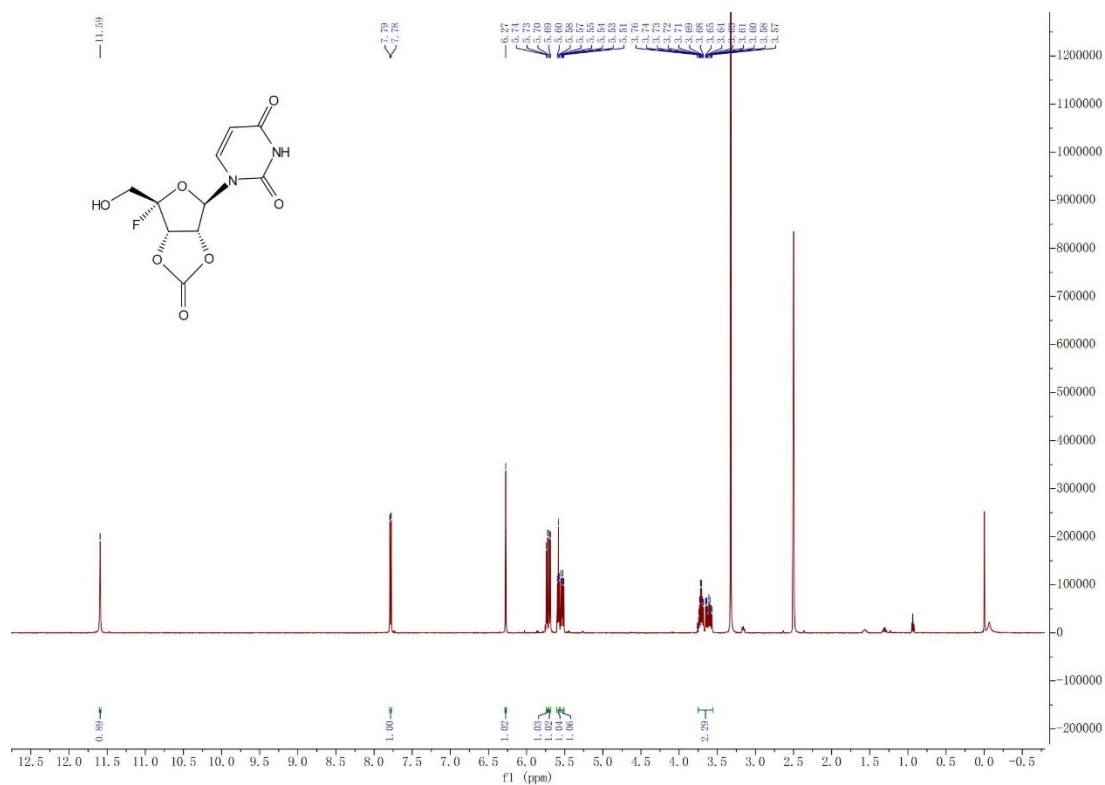

$^{13}\text{C}$  NMR (126 MHz,  $\text{DMSO-}d_6$ )

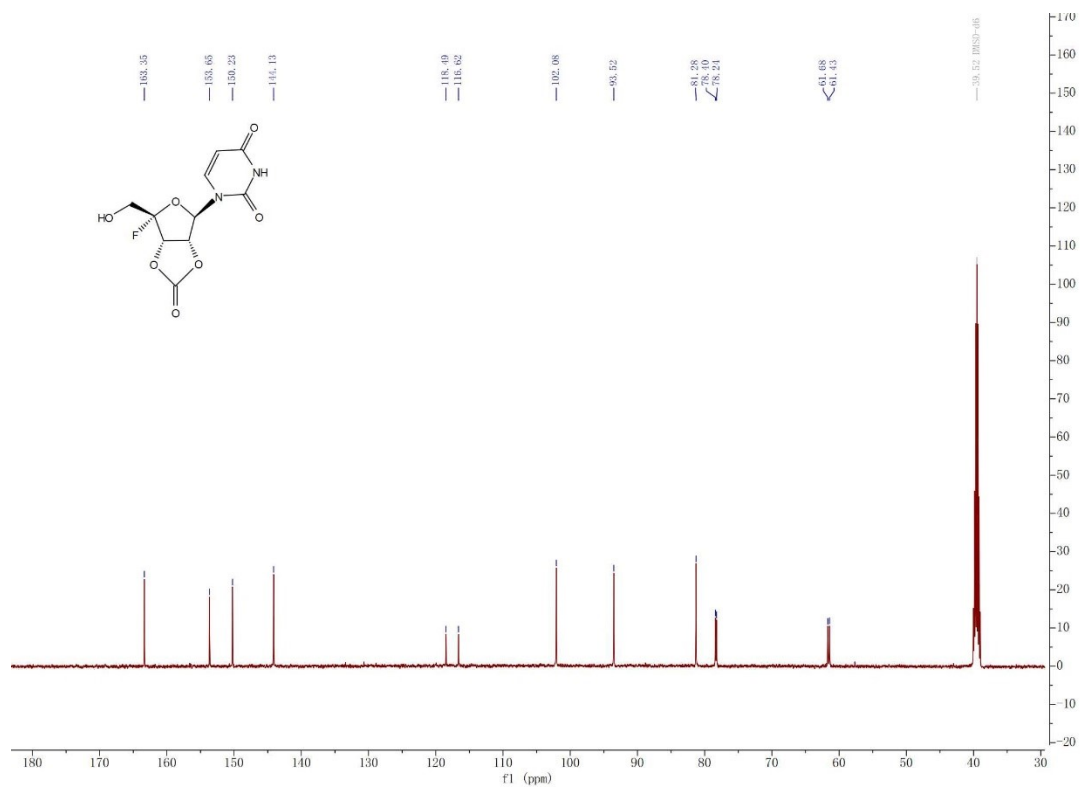



## 16. $^1\text{H}$ NMR, $^{13}\text{C}$ NMR spectrum of compound 4e

$^1\text{H}$  NMR (500 MHz,  $\text{DMSO}-d_6$ )

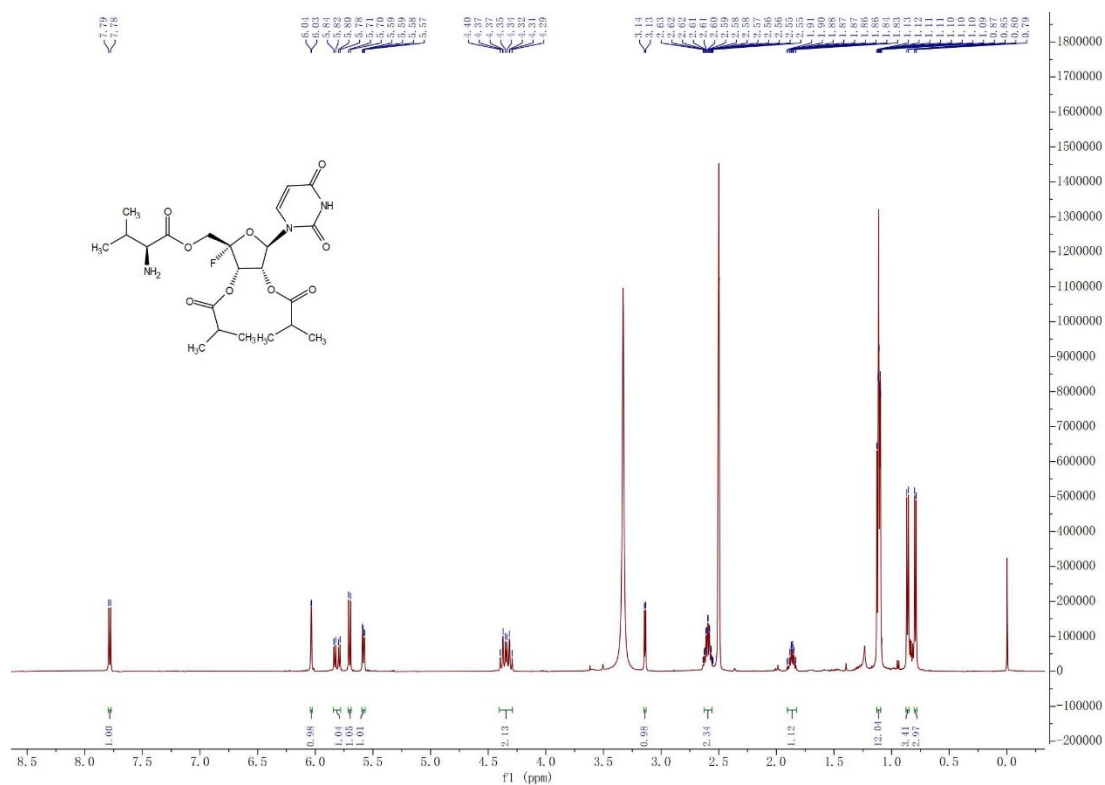

$^{13}\text{C}$  NMR (151 MHz,  $\text{DMSO}-d_6$ )

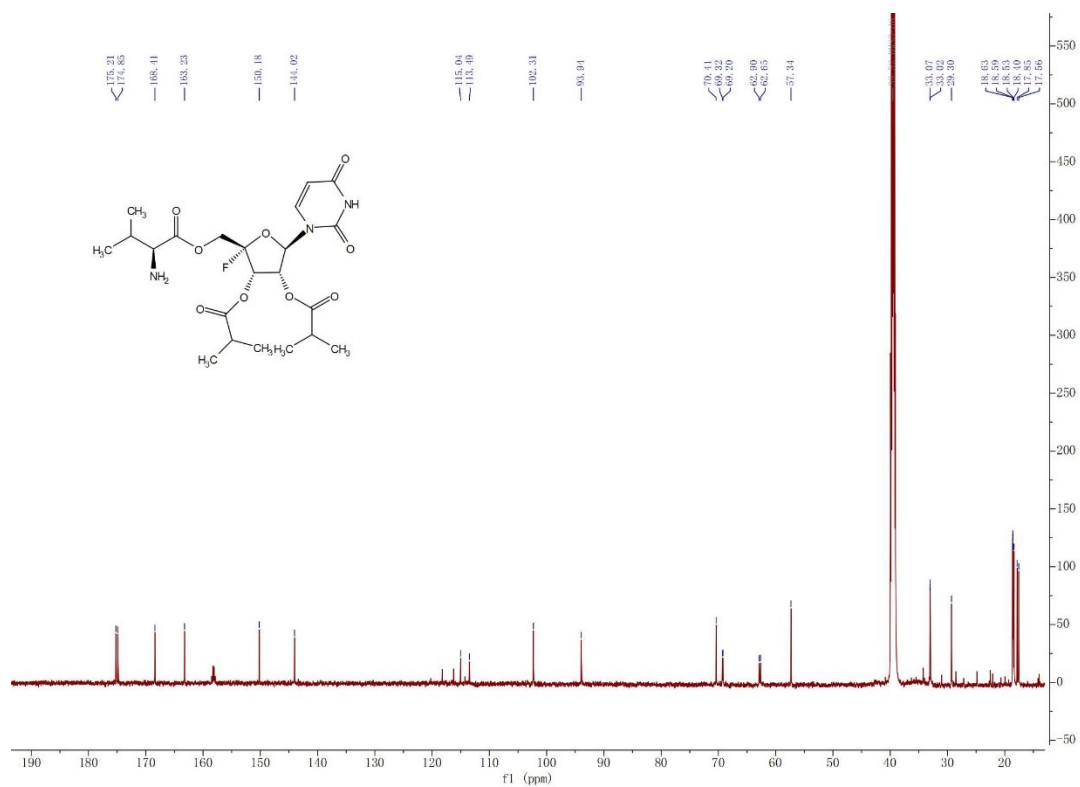

## 17. The HPLC chromatogram of compound 22 in pH 2.0 buffers at day 7

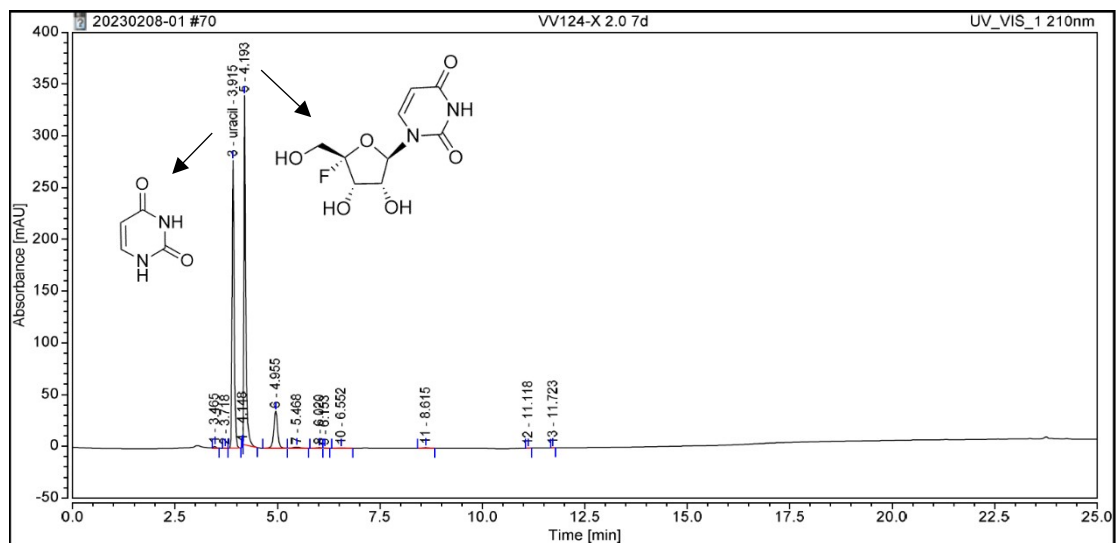

| Integration Results |           |                    |                 |                |                |                |                 |             |
|---------------------|-----------|--------------------|-----------------|----------------|----------------|----------------|-----------------|-------------|
| No.                 | Peak Name | Retention Time min | Area mAU*s      | Height mAU     | Rel.Area %     | Asymmetry (EP) | Resolution (EP) | Plates (EP) |
| 1                   | uracil    | 3.465              | 5.68154         | 1.822          | 0.2615         | 1.4            | 3.1             | 32127       |
| 2                   |           | 3.718              | 0.71887         | 0.225          | 0.0331         | 1.1            | 2.3             | 29737       |
| 3                   |           | 3.915              | 944.09607       | 278.034        | 43.4549        | 1.2            | 4.0             | 32996       |
| 4                   |           | 4.148              | 0.98240         | 0.927          | 0.0452         | 0.8            | 0.9             | 304265      |
| 5                   |           | 4.193              | 956.94350       | 337.615        | 44.0463        | 2.4            | 6.9             | 66683       |
| 6                   |           | 4.955              | 227.78370       | 35.753         | 10.4844        | 1.0            | 2.0             | 16187       |
| 7                   |           | 5.468              | 14.52673        | 1.069          | 0.6686         | n.a.           | n.a.            | 3880        |
| 8                   |           | 6.020              | 6.77656         | 0.706          | 0.3119         | n.a.           | n.a.            | n.a.        |
| 9                   |           | 6.153              | 1.73867         | 0.309          | 0.0800         | n.a.           | n.a.            | n.a.        |
| 10                  |           | 6.552              | 5.30881         | 0.398          | 0.2444         | 1.1            | 6.8             | 5494        |
| 11                  |           | 8.615              | 6.93416         | 0.722          | 0.3192         | 1.0            | 14.8            | 18062       |
| 12                  |           | 11.118             | 0.55572         | 0.169          | 0.0256         | 1.1            | 7.0             | 284677      |
| 13                  |           | 11.723             | 0.54054         | 0.163          | 0.0249         | 1.1            | n.a.            | 275015      |
| <b>Total:</b>       |           |                    | <b>2172.587</b> | <b>657.913</b> | <b>100.000</b> | <b>12.33</b>   |                 |             |

## 18. The HPLC chromatogram of compound 4d in pH 2.0 buffers at day 7

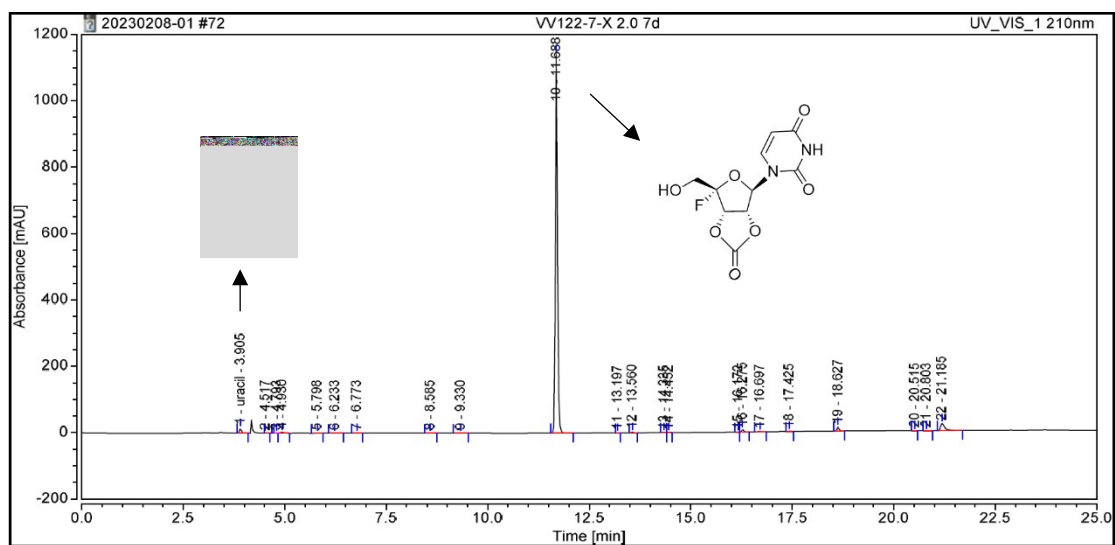

| Integration Results |           |                       |                 |                 |                |                |                 |             |
|---------------------|-----------|-----------------------|-----------------|-----------------|----------------|----------------|-----------------|-------------|
| No.                 | Peak Name | Retention Time<br>min | Area<br>mAU*s   | Height<br>mAU   | Rel.Area<br>%  | Asymmetry (EP) | Resolution (EP) | Plates (EP) |
| 1                   | uracil    | 3.905                 | 49.66608        | 14.648          | 1.0902         | 1.2            | 5.0             | 32939       |
| 2                   |           | 4.517                 | 0.55310         | 0.072           | 0.0121         | 4.3            | 2.7             | 12842       |
| 3                   |           | 4.793                 | 0.27453         | 0.090           | 0.0060         | n.a.           | n.a.            | n.a.        |
| 4                   |           | 4.930                 | 20.77654        | 3.242           | 0.4561         | 0.8            | 5.1             | 17570       |
| 5                   |           | 5.798                 | 2.40001         | 0.336           | 0.0527         | 1.0            | 2.0             | 14057       |
| 6                   |           | 6.233                 | 1.70644         | 0.180           | 0.0375         | 1.3            | 2.5             | 11129       |
| 7                   |           | 6.773                 | 1.00432         | 0.139           | 0.0220         | 1.0            | 8.3             | 19584       |
| 8                   |           | 8.585                 | 1.92150         | 0.220           | 0.0422         | 1.0            | 2.9             | 20130       |
| 9                   |           | 9.330                 | 2.77476         | 0.273           | 0.0609         | 1.0            | 12.6            | 17883       |
| 10                  |           | 11.688                | 4231.44599      | 1141.479        | 92.8827        | 1.2            | 17.8            | 242951      |
| 11                  |           | 13.197                | 0.45357         | 0.158           | 0.0100         | 1.0            | 4.5             | 489761      |
| 12                  |           | 13.560                | 8.31415         | 2.429           | 0.1825         | 1.2            | 8.7             | 379650      |
| 13                  |           | 14.335                | 2.68010         | 0.771           | 0.0588         | n.a.           | 1.3             | 401611      |
| 14                  |           | 14.452                | 1.01826         | 0.302           | 0.0224         | n.a.           | 20.1            | 451315      |
| 15                  |           | 16.172                | 1.13736         | 0.365           | 0.0250         | n.a.           | 1.2             | 569799      |
| 16                  |           | 16.275                | 24.50250        | 7.055           | 0.5378         | 1.2            | 4.7             | 552673      |
| 17                  |           | 16.697                | 4.18665         | 0.977           | 0.0919         | 1.0            | 7.6             | 514694      |
| 18                  |           | 17.425                | 3.14066         | 0.810           | 0.0689         | 1.2            | 12.7            | 483599      |
| 19                  |           | 18.627                | 41.86576        | 11.927          | 0.9190         | 1.2            | 18.1            | 699714      |
| 20                  |           | 20.515                | 0.77629         | 0.175           | 0.0170         | 1.0            | 1.9             | 470530      |
| 21                  |           | 20.803                | 0.69329         | 0.100           | 0.0152         | 1.3            | 2.1             | 193957      |
| 22                  |           | 21.185                | 154.39543       | 21.447          | 3.3891         | 2.3            | n.a.            | 244735      |
| <b>Total:</b>       |           |                       | <b>4555.687</b> | <b>1207.195</b> | <b>100.000</b> | <b>24.20</b>   |                 |             |
